# Supplementary material for: Characterization of blaKPC-2 and blaNDM-1 Plasmids of a K. pneumoniae ST11 Outbreak Clone
Source: MDPI journal article supplement (doi:10.3390/antibiotics12050926), 2023-05-18
Supplement: s1 [file s1]

**Table S1.** Sequences of primers used in this study.

| Primer                            | Sequence (5' – 3')      |
|-----------------------------------|-------------------------|
| <i>bla</i> <sub>KPC</sub> _F      | CGTCTAGTTCTGCTGTCTTG    |
| <i>bla</i> <sub>KPC</sub> _R      | CTTGTCATCCTTGTTAGGCG    |
| <i>bla</i> <sub>NDM</sub> _F      | GGTTTGGCGATCTGGTTTTTC   |
| <i>bla</i> <sub>NDM</sub> _R      | CGGAATGGCTCATCACGATC    |
| 4281                              | GGCACGGCAAATGACTA       |
| 4714                              | GAAGATGCCAAGGTCAATGC    |
| 3781L                             | GCTTTCTTGCTGCCGCTGTG    |
| 3098U                             | TGACCCTGAGCGGCGAAAGC    |
| 905L                              | GCGACCGGTCAGTTCCTTCT    |
| 816U                              | CACCTACACCACGACGAACC    |
| <i>mdh</i> _Ecoli_F               | CGATCTGAGCCATATCCCTACT  |
| <i>mdh</i> _Ecoli_R               | GAACGATCCATAACCCGGTTTAC |
| <i>mdh</i> _Kpneumoniae_F         | GCGGATGTAGTGCTGATCTC    |
| <i>mdh</i> _Kpneumoniae_R         | CTGCTGCACGAGGTTCTT      |
| <i>bla</i> <sub>KPC</sub> _qPCR_F | GGCGGCTCCATCGGTGTGTA    |
| <i>bla</i> <sub>KPC</sub> _qPCR_R | AATTGGCGGCGGCGTTATCA    |
| <i>bla</i> <sub>NDM</sub> _qPCR_F | GATTGCGACTTATGCCAATG    |
| <i>bla</i> <sub>NDM</sub> _qPCR_R | TCGATCCCAACGGTGATATT    |

**Table S2.** Description of the 15 and 11 genes found exclusively in BHKPC93 and BHKPC104.

| Proteins of unique genes                                         | Present only in | Chromosome/plasmid  | Contig / Coordinate / Strand |
|------------------------------------------------------------------|-----------------|---------------------|------------------------------|
| IS6-like element IS26 family transposase                         | BHKPC93         | Plasmid pBHKPC93_4  | 5 / 51764 – 52468 / -        |
| IS6-like element IS26 family transposase                         | BHKPC93         | Plasmid pBHKPC93_4  | 5 / 48769 – 49473 / +        |
| IS6-like element IS26 family transposase                         | BHKPC93         | Plasmid pBHKPC93_6  | 3 / 83846 – 84550 / +        |
| Tn3-like element Tn5403 family transposase                       | BHKPC93         | Plasmid pBHKPC93_6  | 3 / 81730 – 83787 / -        |
| IS3-like element ISKpn18 family transposase                      | BHKPC93         | Plasmid pBHKPC93_5  | 4 / 89237 – 90115 / +        |
| Cobalamin biosynthesis protein CbiX                              | BHKPC93         | Plasmid pBHKPC93_3  | 6 / 31925 – 32205 / +        |
| Cobalamin biosynthesis protein CbiX                              | BHKPC93         | Plasmid pBHKPC93_3  | 6 / 32630 – 32926 / +        |
| ANT(3'')-Ia family aminoglycoside nucleotidyltransferase AadA2   | BHKPC93         | Plasmid pBHKPC93_6  | 3 / 79338 – 80117 / -        |
| quaternary ammonium compound efflux SMR transporter QacE delta 1 | BHKPC93         | Plasmid pBHKPC93_6  | 3 / 78827 – 79174 / -        |
| sulfonamide-resistant dihydropteroate synthase Sul1              | BHKPC93         | Plasmid pBHKPC93_6  | 3 / 77994 – 78833 / -        |
| hypothetical protein                                             | BHKPC93         | Plasmid pBHKPC93_3  | 6 / 31380 – 31712 / +        |
| hypothetical protein                                             | BHKPC93         | Plasmid pBHKPC93_3  | 6 / 32274 – 32474 / +        |
| hypothetical protein                                             | BHKPC93         | Plasmid pBHKPC93_3  | 6 / 32959 – 33066 / +        |
| hypothetical protein                                             | BHKPC93         | Plasmid pBHKPC93_6  | 3 / 77594 – 77866 / -        |
| MFS-type transporter                                             | BHKPC93         | Chromosome          | 1 / 1497284 – 1498471 / -    |
| IS6-like element IS26 family transposase                         | BHKPC104        | Plasmid pBHKPC104_6 | 2 / 164221 – 164826 / +      |
| Anti-restriction protein ArdA                                    | BHKPC104        | Plasmid pBHKPC104_3 | 5 / 36942 – 37451 / +        |
| Anti-restriction protein ArdA                                    | BHKPC104        | Plasmid pBHKPC104_3 | 5 / 35600 – 36109 / +        |
| TrbG/VirB9 family P-type conjugative transfer protein            | BHKPC104        | Plasmid pBHKPC104_5 | 3 / 27981 – 28421 / +        |
| aminoglycoside O-phosphotransferase APH(3')-Ia                   | BHKPC104        | Plasmid pBHKPC104_6 | 2 / 165016 – 165831 / -      |
| IS5-like element ISKpn13 family transposase                      | BHKPC104        | Chromosome          | 1 / 2993526 – 2994460 / +    |
| IS5-like element ISKpn26 family transposase                      | BHKPC104        | Chromosome          | 1 / 2680867 – 2681847 / -    |
| Carbohydrate porin                                               | BHKPC104        | Chromosome          | 1 / 4650295 – 4651677 / -    |
| Carbohydrate porin                                               | BHKPC104        | Chromosome          | 1 / 50221 – 51600 / -        |
| MFS transporter                                                  | BHKPC104        | Chromosome          | 1 / 2710758 – 2710979 / +    |
| hypothetical protein                                             | BHKPC104        | Chromosome          | 1 / 4692771 – 4692992 / +    |

**TableS3.** Resistance genes found in BHKPC93 and BHKPC104.

| Resistance gene              | Identity | Alignment Length/Gene Length | Position in reference | Phenotype                                                                                                                                                                                                                                                  | Accession no. |
|------------------------------|----------|------------------------------|-----------------------|------------------------------------------------------------------------------------------------------------------------------------------------------------------------------------------------------------------------------------------------------------|---------------|
| <i>aac(3)-IIa</i>            | 100.0    | 861/861                      | 1..861                | gentamicina, tobramycin,                                                                                                                                                                                                                                   | CP023555      |
| <i>aac(6')-Ib-cr</i>         | 100.0    | 600/600                      | 1..600                | ciprofloxacin                                                                                                                                                                                                                                              | DQ303918      |
| <i>aph(3')-Ia</i>            | 100.0    | 816/816                      | 1..816                | neomycin, kanamycin, lividomycin, paromomycin, ribostamycin                                                                                                                                                                                                | V00359        |
| <i>aadA2</i>                 | 100.0    | 792/792                      | 1..792                | spectinomycin, streptomycin                                                                                                                                                                                                                                | JQ364967      |
| <i>fosA</i>                  | 99.27    | 412/420                      | 1..412                | fosfomycin                                                                                                                                                                                                                                                 | ACWO01000079  |
| <i>sul1</i>                  | 100.0    | 840/840                      | 1..840                | sulfamethoxazole                                                                                                                                                                                                                                           | U12338        |
| <i>dfrA12</i>                | 100.0    | 498/498                      | 1..498                | trimethoprim                                                                                                                                                                                                                                               | AM040708      |
| <i>OqxB</i>                  | 100.0    | 3153/3153                    | 1..3153               | chloramphenicol, benzylkonium chloride, cetylpyridinium chloride, nalidixic acid, ciprofloxacin, trimethoprim                                                                                                                                              | EU370913      |
| <i>OqxA</i>                  | 100.0    | 1176/1176                    | 1..1176               | chloramphenicol, benzylkonium chloride, cetylpyridinium chloride, nalidixic acid, ciprofloxacin, trimethoprim                                                                                                                                              | EU370913      |
| <i>sul2</i>                  | 100.0    | 816/816                      | 1..816                | sulfamethoxazole                                                                                                                                                                                                                                           | AY034138      |
| <i>qnrS1</i>                 | 100.0    | 657/657                      | 1..657                | ciprofloxacin                                                                                                                                                                                                                                              | AB187515      |
| <i>tet(A)</i>                | 99.92    | 1200/1200                    | 1..1200               | doxycycline, tetracycline                                                                                                                                                                                                                                  | AJ517790      |
| <i>bla<sub>SHV-182</sub></i> | 99,88    | 861/861                      | 1..861                | unknown beta-lactam                                                                                                                                                                                                                                        | KP050489      |
| <i>bla<sub>KPC-2</sub></i>   | 100.0    | 882/882                      | 1..882                | amoxicillin, amoxicillin+clavulanic acid, ampicillin, ampicillin+clavulanic acid, aztreonam, cefepime, cefotaxime, cefoxitin, ceftazidime, ertapenem, imipenem, meropenem, piperacillin, piperacillin+tazobactam, ticarcillin, ticarcillin+clavulanic acid | AY034847      |

|                                |       |         |        |                                                                                                                                                                                                                             |          |
|--------------------------------|-------|---------|--------|-----------------------------------------------------------------------------------------------------------------------------------------------------------------------------------------------------------------------------|----------|
| <i>bla</i> <sub>NDM-1</sub>    | 100.0 | 813/813 | 1..813 | amoxicillin, amoxicillin+clavulanic acid, ampicillin, ampicillin+clavulanic acid, cefepime, cefixime, cefotaxime, cefoxitin, ceftazidime, ertapenem, imipenem, meropenem, piperacillin, piperacillin+tazobactam, temocillin | FN396876 |
| <i>bla</i> <sub>LAP-2</sub>    | 100.0 | 858/858 | 1..858 | amoxicillin, ampicillin, cephalotin, piperacillin, ticarcillin                                                                                                                                                              | EU159120 |
| <i>bla</i> <sub>OXA-1</sub>    | 100.0 | 831/831 | 1..831 | amoxicillin, amoxicillin+clavulanic acid, ampicillin, ampicillin+clavulanic acid, cefepime, piperacillin, piperacillin+tazobactam                                                                                           | HQ170510 |
| <i>bla</i> <sub>CTX-M-15</sub> | 100.0 | 876/876 | 1..876 | amoxicillin, ampicillin, aztreonam, cefepime, cefotaxime, ceftazidime, ceftriaxone, piperacillin, ticarcillin                                                                                                               | AY044436 |
| <i>mph</i> (A)                 | 100.0 | 906/906 | 1..906 | erythromycin, azithromycin, spiramycin, telithromycin                                                                                                                                                                       | D16251   |
| <i>qacE</i>                    | 100.0 | 282/333 | 1..282 | benzylkonium chloride, ethidium bromide, chlorhexidine, cetylpyridinium chloride                                                                                                                                            | X68232   |
| <i>catB3</i>                   | 100.0 | 442/633 | 1..442 | chloramphenicol                                                                                                                                                                                                             | U13880   |

---

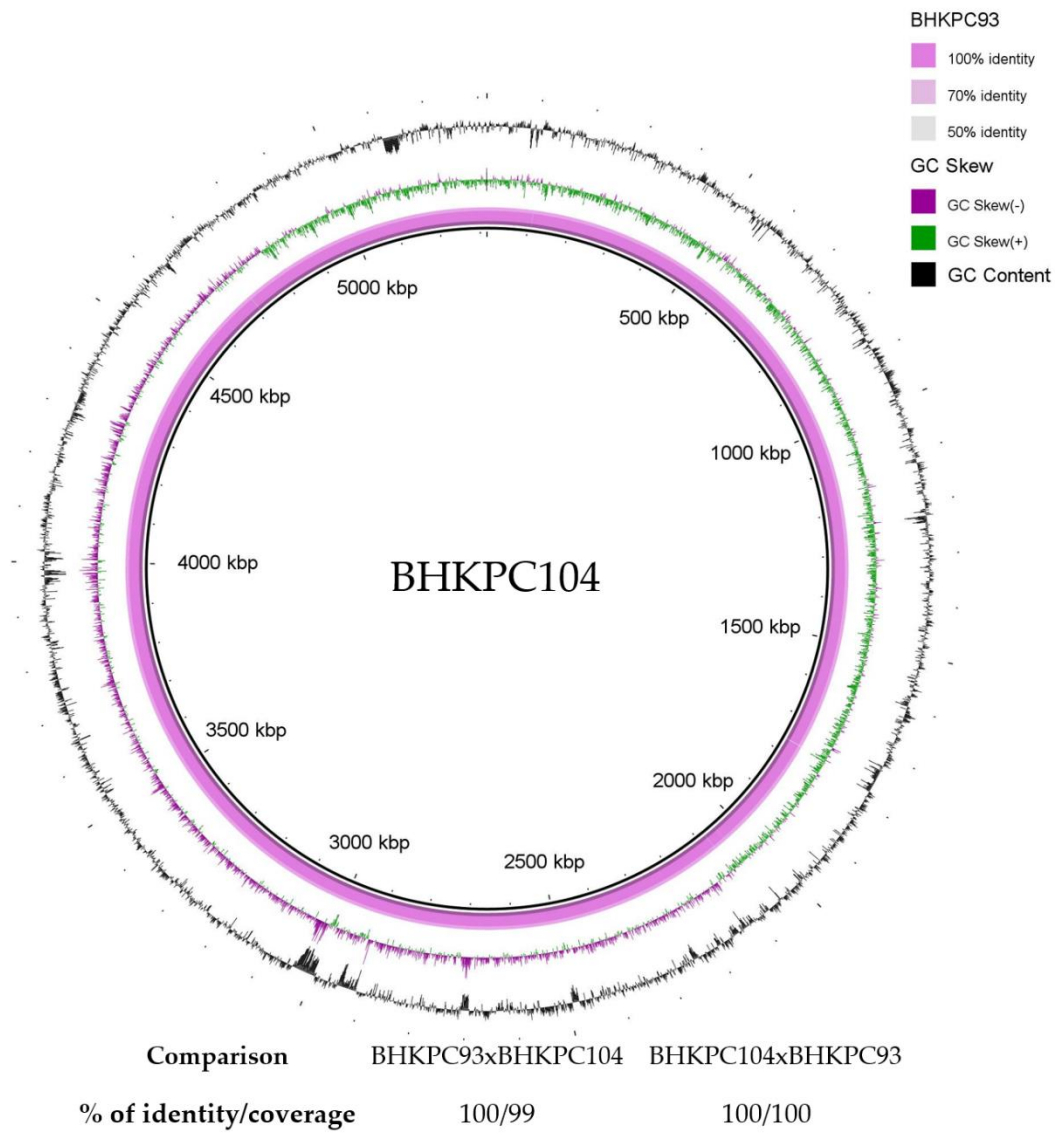

**Figure S1.** Scheme of chromosome comparison using BHKPC104 as reference and comparing with BHKPC93.



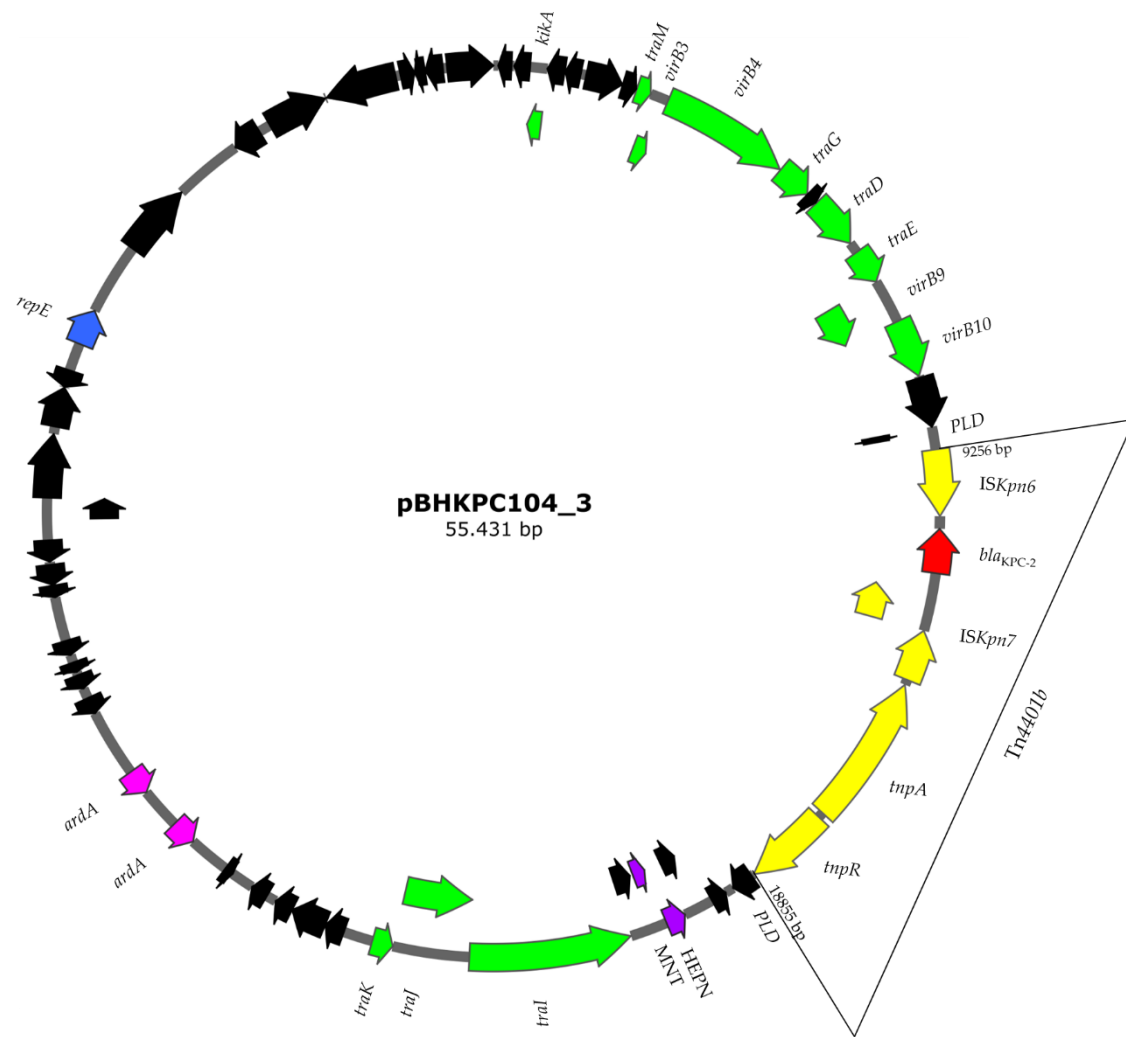

**Figure S3.** Scheme of pBHKPC104\_3. Carbapenemase gene is represented in red, genetic environment genes of *bla<sub>KPC</sub>* are represented in yellow, plasmid replication initiator is represented in blue, T/A system genes are represented in purple, genes involved in plasmid conjugation are represented in green and the unique genes present only in BHKPC104 are represented in pink.

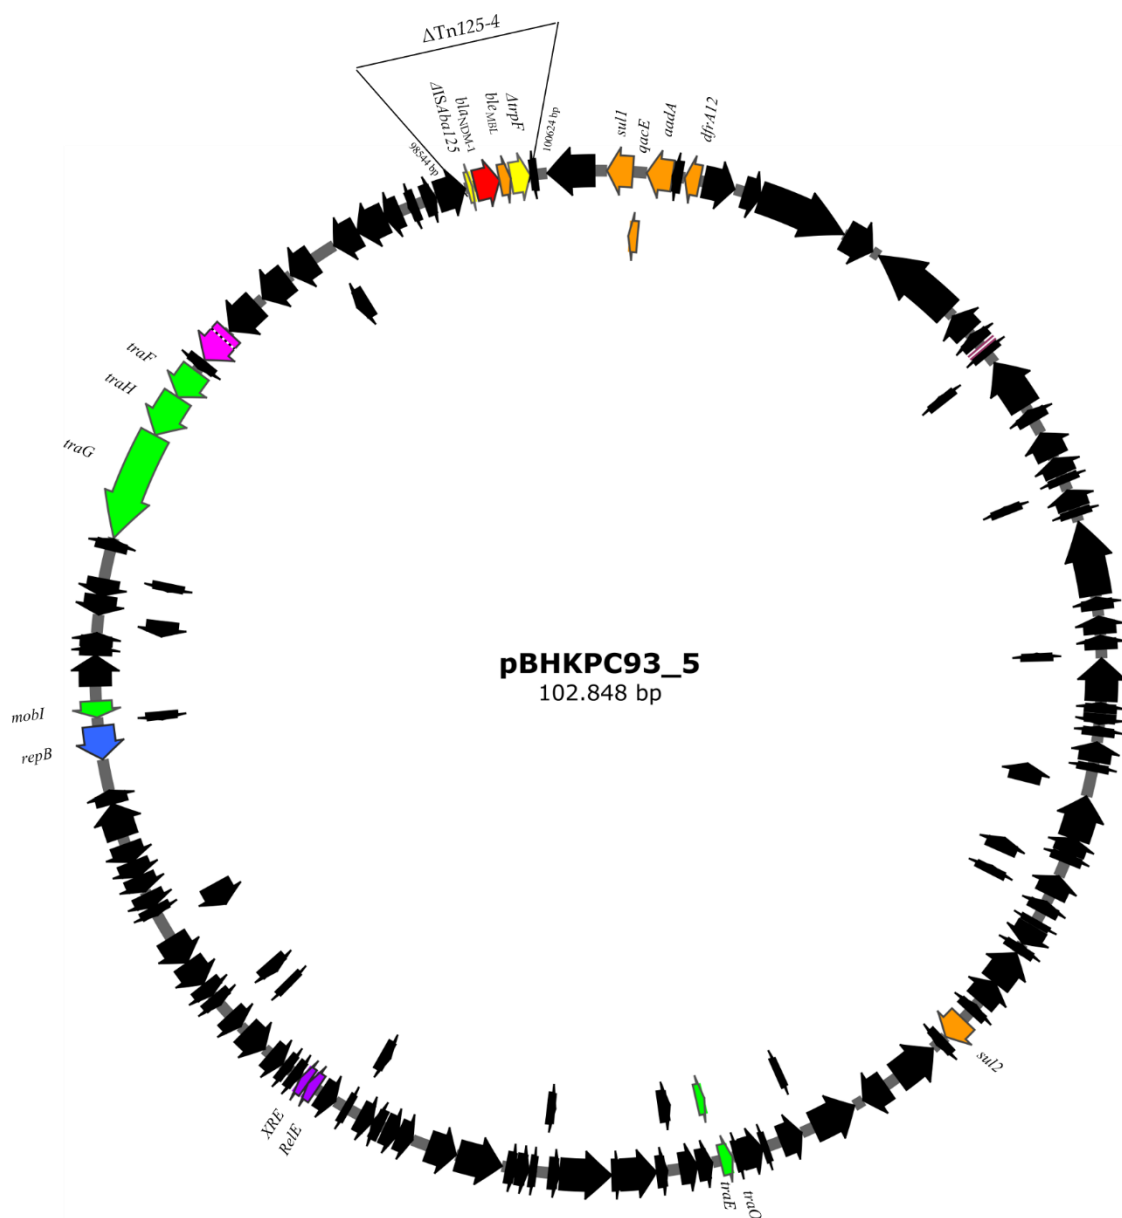

**Figure S4.** Scheme of pBHKPC93\_5. Carbapenemase gene is represented in red, genetic environment genes of *bla<sub>NDM</sub>* are represented in yellow, other resistance genes are represented in Orange, plasmid replication initiator is represented in blue, T/A system genes are represented in purple, genes involved in plasmid conjugation are represented in green and the unique genes present only in BHKPC93 are represented in pink.



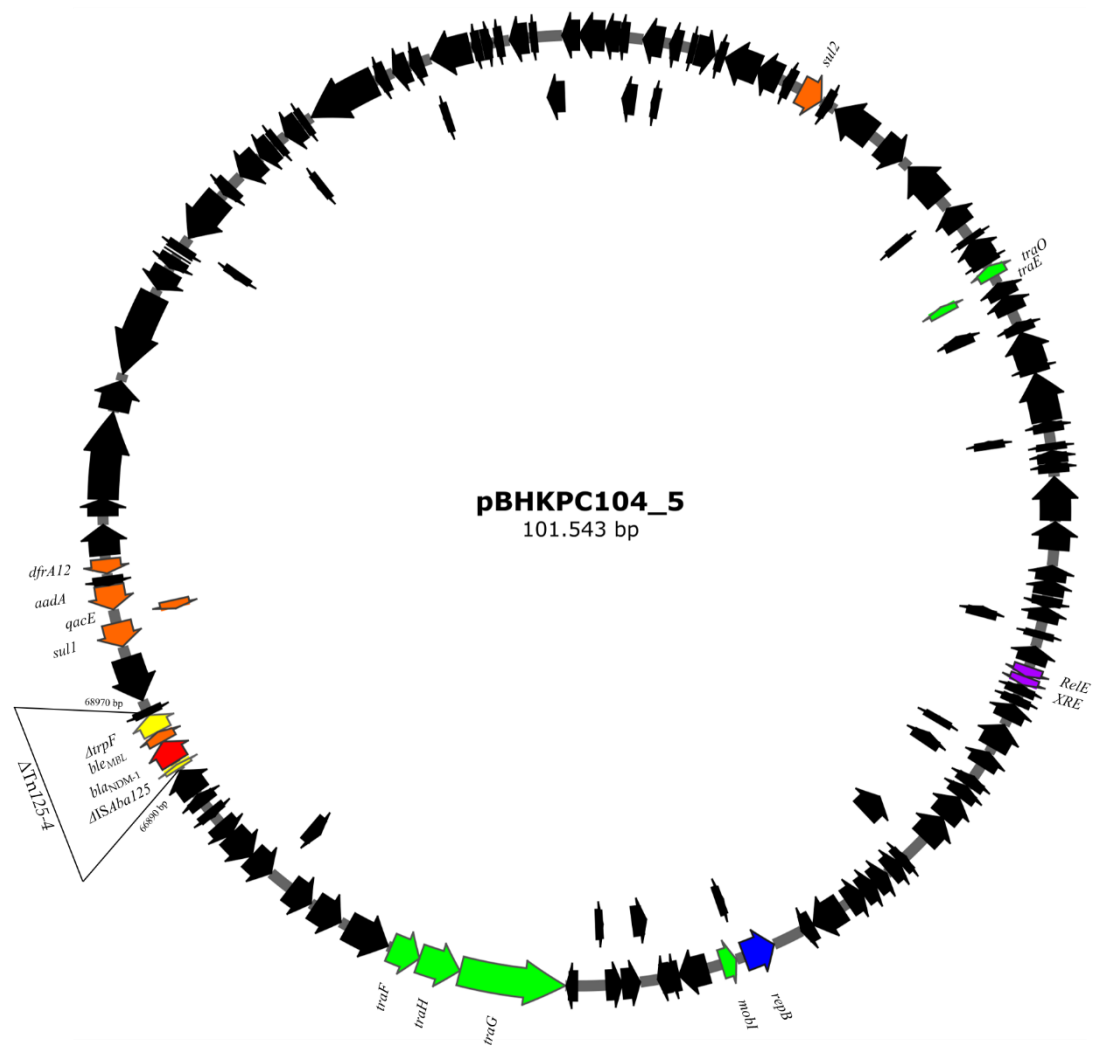

**Figure S5.** Scheme of pBHKPC104\_5. Carbapenemase gene is represented in red, genetic environment genes of *blpNDM* are represented in yellow, other resistance genes are represented in Orange, plasmid replication initiator is represented in blue, T/A system genes are represented in purple and genes involved in plasmid conjugation are represented in green.

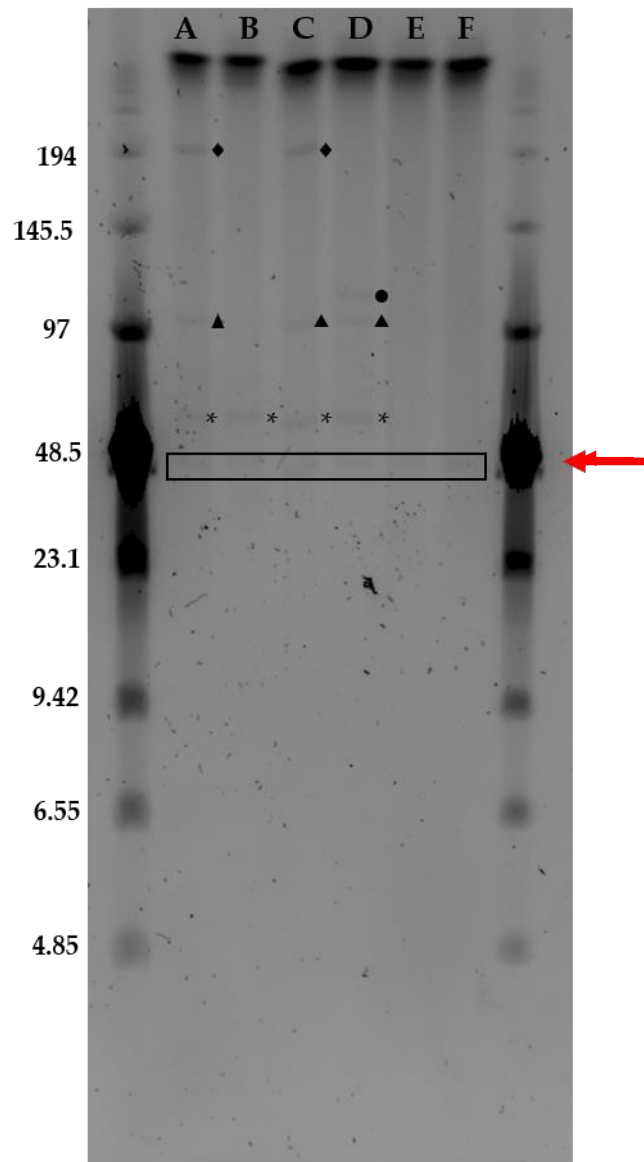

**Figure S6.** S1 nuclease PFGE gel of the isolates BHKPC93 (A), BHKPC104 (B), BHKPC107a (C), and BHKPC107b (D), and the transconjugants J53\_pBHKPC93\_3 (E) and J53\_pBHKPC104\_3 (F). Red arrow indicates the bands corresponding to the *bla<sub>kpc</sub>* plasmid. Rhombus, circle, triangles, asterisks and the rectangle highlight the plasmid bands. Low Range PFG Marker (New England Biolabs, EUA) was used as molecular weight and it has been run on both of the outer lanes.

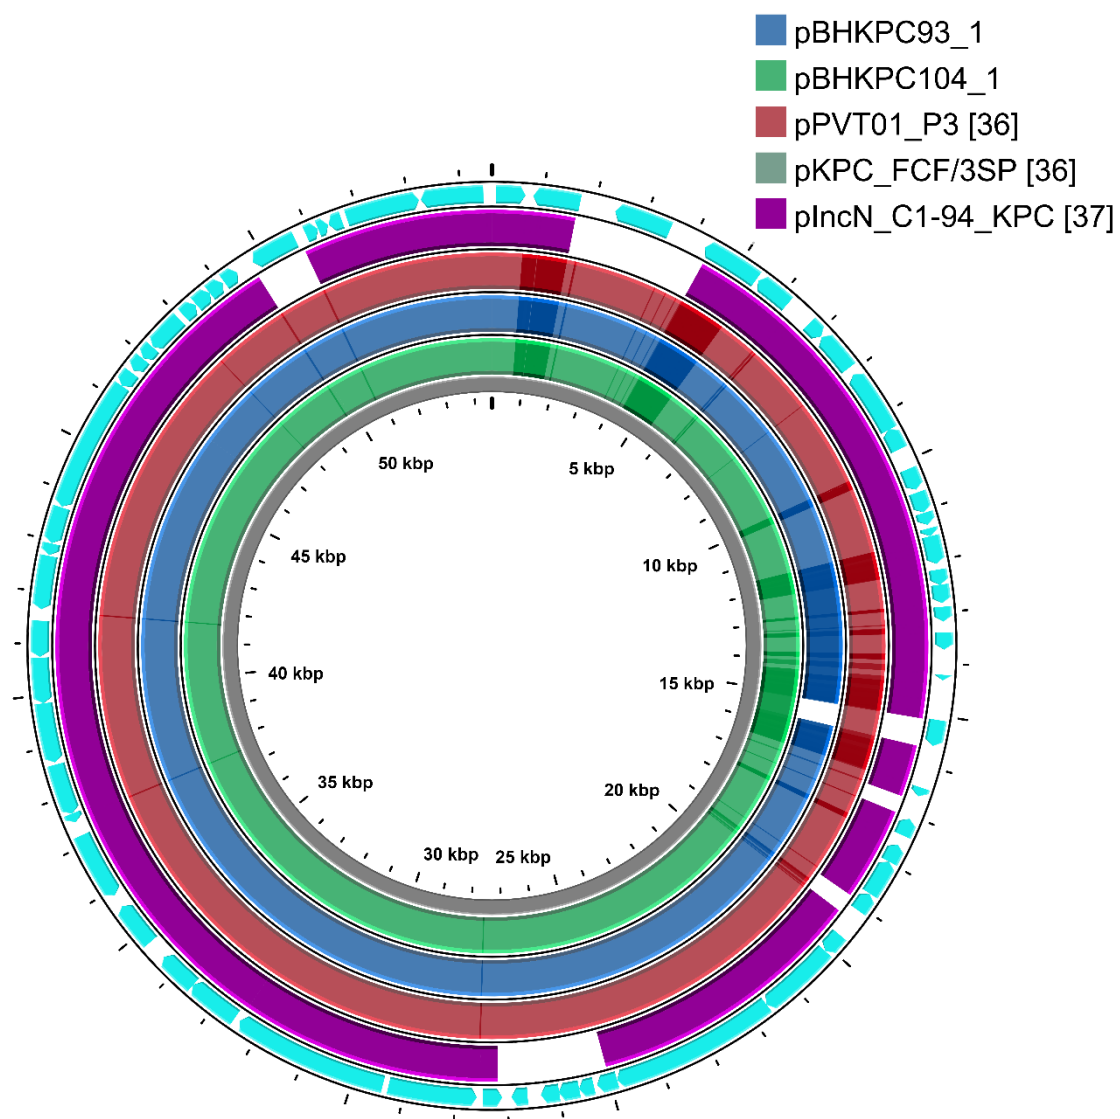

Figure S7. Scheme of the comparison between pBHKPC93\_3 and pBHKPC104\_3 with another IncN - plasmids harboring *bla<sub>KPC</sub>* already described.
